# Supplementary material
Source: publisher figshare collection journal article supplement (https://plos.figshare.com/articles/dataset/_/3927099)
Supplement: Supplementary file [file 1]

**S1 Table. Annual IgG and IgM prevalences (for each epidemiological year)**

| Epidemiological year | No. animals IgG positive | No. animals IgG tested | No. herds (clusters) | IgG prevalence | Lower CI (IgG prev) | Upper CI (IgG prev) | No. animals IgM positive | No. animals IgM tested | No. herds (clusters) | IgM prevalence | Lower CI (IgM prev) | Upper CI (IgM prev) |
|----------------------|--------------------------|------------------------|----------------------|----------------|---------------------|---------------------|--------------------------|------------------------|----------------------|----------------|---------------------|---------------------|
| 2004-05              | 33                       | 243                    | 67                   | 13.58          | 8.46                | 18.70               | 0                        | 0                      | NA                   | NA             | NA                  | NA                  |
| 2005-06              | 1                        | 22                     | 2                    | 4.55           | 0                   | 18.31               | 0                        | 0                      | NA                   | NA             | NA                  | NA                  |
| 2006-07              | 20                       | 169                    | 46                   | 11.83          | 7.08                | 16.59               | 0                        | 0                      | NA                   | NA             | NA                  | NA                  |
| 2007-08              | 111                      | 647                    | 143                  | 17.16          | 12.09               | 22.22               | 3                        | 16                     | 7                    | 18.75          | 0                   | 44.95               |
| 2008-09              | 51                       | 142                    | 11                   | 35.92          | 16.69               | 55.14               | 39                       | 96                     | 9                    | 40.62          | 24.86               | 56.39               |
| 2009-10              | 154                      | 591                    | 52                   | 26.06          | 19.44               | 32.67               | 28                       | 77                     | 9                    | 36.36          | 21.55               | 51.18               |
| 2010-11              | 26                       | 182                    | 20                   | 14.29          | 10.26               | 18.32               | 4                        | 109                    | 15                   | 3.67           | 0                   | 7.37                |
| 2011-12              | 72                       | 500                    | 44                   | 14.40          | 9.45                | 19.35               | 0                        | 0                      | NA                   | NA             | NA                  | NA                  |
| 2012-13              | 78                       | 645                    | 58                   | 12.09          | 8.28                | 15.91               | 0                        | 0                      | NA                   | NA             | NA                  | NA                  |
| 2013-14              | 122                      | 1253                   | 127                  | 9.74           | 7.18                | 12.29               | 5                        | 576                    | 70                   | 0.87           | 0.01                | 1.73                |
| 2014-15              | 29                       | 462                    | 39                   | 6.28           | 2.78                | 9.78                | 0                        | 462                    | 39                   | 0              | 0                   | 0                   |

CI: Confidence Interval
