# Supplementary material
Source: publisher figshare collection journal article supplement (https://plos.figshare.com/articles/dataset/_/3927099)
Supplement: Supplementary file [file 1]

**S2 Table. Age-stratified IgG prevalence**

| Age group | Epidemiological year | IgG positive | IgG tested | IgG prevalence | Lower CI | Upper CI |
|-----------|----------------------|--------------|------------|----------------|----------|----------|
| 0-1y      | 2008-09              | 2            | 6          | 33.33          | 9.68     | 70       |
| 0-1y      | 2009-10              | 5            | 44         | 11.36          | 4.95     | 23.98    |
| 0-1y      | 2010-11              | 0            | 1          | 0              | 0        | 94.87    |
| 0-1y      | 2011-12              | 0            | 26         | 0              | 0        | 12.87    |
| 0-1y      | 2012-13              | 2            | 58         | 3.45           | 0.95     | 11.73    |
| 0-1y      | 2013-14              | 0            | 70         | 0              | 0        | 5.2      |
| 0-1y      | 2014-15              | 2            | 62         | 3.23           | 0.89     | 11.02    |
| 1-2y      | 2008-09              | 12           | 24         | 50             | 31.43    | 68.57    |
| 1-2y      | 2009-10              | 6            | 32         | 18.75          | 8.89     | 35.31    |
| 1-2y      | 2010-11              | 1            | 5          | 20             | 1.03     | 62.45    |
| 1-2y      | 2011-12              | 3            | 34         | 8.82           | 3.05     | 22.96    |
| 1-2y      | 2012-13              | 2            | 55         | 3.64           | 1        | 12.32    |
| 1-2y      | 2013-14              | 1            | 118        | 0.85           | 0.04     | 4.64     |
| 1-2y      | 2014-15              | 0            | 69         | 0              | 0        | 5.27     |
| 2-3y      | 2008-09              | 11           | 19         | 57.89          | 36.28    | 76.86    |
| 2-3y      | 2009-10              | 10           | 26         | 38.46          | 22.43    | 57.47    |
| 2-3y      | 2010-11              | 0            | 9          | 0              | 0        | 29.91    |
| 2-3y      | 2011-12              | 1            | 44         | 2.27           | 0.12     | 11.81    |
| 2-3y      | 2012-13              | 0            | 33         | 0              | 0        | 10.43    |
| 2-3y      | 2013-14              | 2            | 115        | 1.74           | 0.48     | 6.12     |
| 2-3y      | 2014-15              | 1            | 54         | 1.85           | 0.09     | 9.77     |
| 3-4y      | 2008-09              | 3            | 13         | 23.08          | 8.18     | 50.26    |
| 3-4y      | 2009-10              | 9            | 29         | 31.03          | 17.28    | 49.23    |
| 3-4y      | 2010-11              | 0            | 2          | 0              | 0        | 65.76    |
| 3-4y      | 2011-12              | 2            | 23         | 8.7            | 2.42     | 26.8     |
| 3-4y      | 2012-13              | 2            | 33         | 6.06           | 1.68     | 19.61    |
| 3-4y      | 2013-14              | 2            | 89         | 2.25           | 0.62     | 7.83     |
| 3-4y      | 2014-15              | 1            | 49         | 2.04           | 0.1      | 10.69    |
| 4-5y      | 2008-09              | 5            | 7          | 71.43          | 35.89    | 91.78    |
| 4-5y      | 2009-10              | 4            | 15         | 26.67          | 10.9     | 51.95    |
| 4-5y      | 2010-11              | 1            | 6          | 16.67          | 0.85     | 56.35    |
| 4-5y      | 2011-12              | 2            | 15         | 13.33          | 3.74     | 37.88    |
| 4-5y      | 2012-13              | 5            | 24         | 20.83          | 9.24     | 40.47    |
| 4-5y      | 2013-14              | 3            | 61         | 4.92           | 1.69     | 13.49    |
| 4-5y      | 2014-15              | 2            | 36         | 5.56           | 1.54     | 18.14    |
| 5-6y      | 2008-09              | 5            | 12         | 41.67          | 19.33    | 68.05    |
| 5-6y      | 2009-10              | 6            | 12         | 50             | 25.38    | 74.62    |
| 5-6y      | 2010-11              | 0            | 12         | 0              | 0        | 24.25    |
| 5-6y      | 2011-12              | 8            | 19         | 42.11          | 23.14    | 63.72    |
| 5-6y      | 2012-13              | 7            | 17         | 41.18          | 21.61    | 63.99    |
| 5-6y      | 2013-14              | 4            | 44         | 9.09           | 3.59     | 21.16    |
| 5-6y      | 2014-15              | 0            | 25         | 0              | 0        | 13.32    |
| 6-7y      | 2008-09              | 2            | 6          | 33.33          | 9.68     | 70       |
| 6-7y      | 2009-10              | 3            | 21         | 14.29          | 4.98     | 34.64    |

|             |         |    |     |       |       |       |
|-------------|---------|----|-----|-------|-------|-------|
| 6-7y        | 2010-11 | 2  | 9   | 22.22 | 6.32  | 54.74 |
| 6-7y        | 2011-12 | 6  | 18  | 33.33 | 16.28 | 56.25 |
| 6-7y        | 2012-13 | 8  | 24  | 33.33 | 17.97 | 53.29 |
| 6-7y        | 2013-14 | 7  | 35  | 20    | 10.04 | 35.89 |
| 6-7y        | 2014-15 | 2  | 21  | 9.52  | 2.65  | 28.91 |
| 7-8y        | 2008-09 | 5  | 12  | 41.67 | 19.33 | 68.05 |
| 7-8y        | 2009-10 | 4  | 10  | 40    | 16.82 | 68.73 |
| 7-8y        | 2010-11 | 2  | 6   | 33.33 | 9.68  | 70    |
| 7-8y        | 2011-12 | 6  | 14  | 42.86 | 21.38 | 67.41 |
| 7-8y        | 2012-13 | 2  | 21  | 9.52  | 2.65  | 28.91 |
| 7-8y        | 2013-14 | 15 | 40  | 37.5  | 24.22 | 52.97 |
| 7-8y        | 2014-15 | 3  | 10  | 30    | 10.78 | 60.32 |
| 8-9y        | 2008-09 | 0  | 1   | 0     | 0     | 94.87 |
| 8-9y        | 2009-10 | 9  | 17  | 52.94 | 30.96 | 73.83 |
| 8-9y        | 2010-11 | 1  | 3   | 33.33 | 1.71  | 79.23 |
| 8-9y        | 2011-12 | 4  | 14  | 28.57 | 11.72 | 54.65 |
| 8-9y        | 2012-13 | 9  | 14  | 64.29 | 38.76 | 83.66 |
| 8-9y        | 2013-14 | 5  | 29  | 17.24 | 7.6   | 34.55 |
| 8-9y        | 2014-15 | 3  | 12  | 25    | 8.89  | 53.23 |
| 9-10 & >10y | 2008-09 | 4  | 10  | 40    | 16.82 | 68.73 |
| 9-10 & >10y | 2009-10 | 12 | 35  | 34.29 | 20.83 | 50.85 |
| 9-10 & >10y | 2010-11 | 3  | 11  | 27.27 | 9.75  | 56.56 |
| 9-10 & >10y | 2011-12 | 18 | 47  | 38.3  | 25.79 | 52.57 |
| 9-10 & >10y | 2012-13 | 20 | 56  | 35.71 | 24.46 | 48.81 |
| 9-10 & >10y | 2013-14 | 46 | 107 | 42.99 | 34.01 | 52.45 |
| 9-10 & >10y | 2014-15 | 12 | 32  | 37.5  | 22.93 | 54.75 |

CI: Confidence Interval; y: years old
