# Supplementary material
Source: publisher figshare collection journal article supplement (https://plos.figshare.com/articles/dataset/_/3927099)
Supplement: Supplementary file [file 1]

**S3 Table. Monthly average, minimum and maximum rainfall and temperatures over the period 2004-15 [15]**

|              |           | Rainfall (mm)               |                     |                     | Temperature (°C) |                            |                            |
|--------------|-----------|-----------------------------|---------------------|---------------------|------------------|----------------------------|----------------------------|
| Season       | Month     | Average monthly<br>rainfall | Minimum<br>rainfall | Maximum<br>rainfall | Average monthly  | Average monthly<br>minimum | Average monthly<br>maximum |
| Hot rainy    | December  | 223                         | 105.9               | 442.3               | 27.8             | 23.6                       | 32.1                       |
|              | January   | 321                         | 165.0               | 540.4               | 27.9             | 24.0                       | 31.9                       |
|              | February  | 225                         | 108.0               | 306.8               | 28.0             | 24.4                       | 31.9                       |
|              | March     | 232                         | 121.3               | 341.4               | 28.1             | 23.9                       | 32.8                       |
| Intermediate | April     | 131                         | 58.5                | 257.6               | 27.9             | 23.8                       | 32.6                       |
|              | May       | 45                          | 2.4                 | 104.5               | 27.0             | 22.3                       | 31.9                       |
| Dry cool     | June      | 24                          | 4.2                 | 68.0                | 25.7             | 21.3                       | 29.8                       |
|              | July      | 12                          | 5.6                 | 25.3                | 24.8             | 20.3                       | 29.2                       |
|              | August    | 18                          | 3.1                 | 54.9                | 24.7             | 19.8                       | 29.8                       |
|              | September | 24                          | 4.9                 | 58.6                | 25.3             | 20.6                       | 29.9                       |
| Intermediate | October   | 58                          | 12.5                | 110.6               | 26.4             | 21.8                       | 31.0                       |
|              | November  | 130                         | 70.1                | 256.9               | 27.4             | 22.98                      | 31.7                       |
